# Supplementary material
Source: PubMed Central journal article supplement (PMC2956165)
Supplement: NIHMS236691-supplement-1_si_001.pdf [file NIHMS236691-supplement-1_si_001.pdf]

Supporting Information for

**Active Site Threonine Facilitates Proton Transfer During Dioxygen Activation  
at the Diiron Center of Toluene/*o*-Xylene Monooxygenase Hydroxylase**

Woon Ju Song,<sup>†</sup> Michael S. McCormick,<sup>†</sup> Rachel K. Behan,<sup>†</sup> Matthew H. Sazinsky,<sup>§</sup> Wei Jiang,<sup>‡</sup>  
Jeffery Lin,<sup>§</sup> Carsten Krebs,<sup>‡</sup> Stephen J. Lippard<sup>\*,†</sup>

<sup>†</sup>*Department of Chemistry, Massachusetts Institute of Technology, Cambridge, Massachusetts 02139,*  
<sup>§</sup>*Department of Chemistry, Pomona College, Claremont, California 91711, and* <sup>‡</sup>*Department of Biochemistry*  
*and Molecular Biology and Department of Chemistry, The Pennsylvania State University, University Park,*  
*Pennsylvania 16802*

Email: lippard@mit.edu

**General Considerations.** Plasmids containing the genes for the toluene/*o*-xylene monooxygenase components were supplied by the laboratory of Professor Alberto Di Donato, Naples, Italy. The preparation of all ToMO components was described previously.<sup>1</sup> Heterologous expression and purification of four ToMO component proteins, the hydroxylase (ToMOH), Rieske (ToMOC), reductase (ToMOF), and regulatory (ToMOD) proteins, were carried out as described.<sup>1,2</sup> Identical conditions were used to prepare ToMOH T201 variants. Conversion of T201 into T201C, T201G, and T201V was performed by site-directed mutagenesis as described<sup>2</sup> using the parent pET22b(+)/touBEA plasmid with the following designed primers (5'-C GAA ACA GGC TTC GGT AAT ATG CAG TTT C-3' and 5'-G AAA CTG CAT ATT ACC GAA GCC TGT TTC G-3' for T201G; 5'-C GAA ACA GGC TTC GTT AAT ATG CAG TTT CTC G-3' and 5'-C GAG AAA CTG CAT ATT AAC GAA GCC TGT TTC G-3' for T201V; and 5'-C ATT CGA AAC AGGC TTC TGC AAT ATG CAG TTT CTC-3' and 5'-GAG AAA CTG CAT ATT GCA GAA GCC TGT TTC GAA TG-3' for T201C. The primers were obtained from Integrated DNA Technologies. Detailed procedures for iron assays,<sup>1</sup> specific activity determinations with phenol,<sup>3</sup> measurements of the regioselectivity of toluene and *o*-xylene oxidation,<sup>2</sup> and single-turnover assays<sup>4</sup> were described previously.

**Crystallization, Data collection, Structure Determination, and Refinement.** The crystallization conditions for ToMOH T201X enzymes followed previously published procedures.<sup>5,6</sup> X-ray diffraction data were collected at the SSRL on beam line 11-1 or 12-2. Phasing of ToMOH T201X data was accomplished by using EPMR and the 1.85 Å native ToMOH coordinates (PDB code 2INC) as described previously.<sup>5,6</sup>

**Characterization of Oxygenated Intermediates in ToMOH T201G by Mössbauer Spectroscopy.**

The <sup>57</sup>Fe-enriched T201G ToMOH sample was prepared as described previously.<sup>2</sup> For

Mössbauer experiments,  $^{57}\text{Fe}$ -enriched ToMOH T201G (500-800  $\mu\text{M}$ ) was reduced anaerobically by reacting the protein with excess sodium dithionite in the presence of an equimolar amount of methyl viologen for 30 min. The reduced protein was dialyzed against 1 L of 25 mM MOPS, pH 7.0 buffer for  $\sim 3$  hr, anaerobically. Following dialysis, the regulatory protein was added to the reduced hydroxylase. The solution was transferred into a Mössbauer cup and rapidly frozen in liquid  $\text{N}_2$ . To prepare an oxygenated sample of the T201G variant, a solution of T201G ToMOH<sub>red</sub>:D was manually mixed with an equal volume of  $\text{O}_2$ -saturated buffer at 4  $^\circ\text{C}$  for 15 s and the reaction was quenched by rapidly spraying the solution into liquid nitrogen. As a control experiment, we also carried out the reaction using the T201S variant, as described previously.<sup>2</sup> The experimental conditions for Mössbauer experiments were as previously reported.<sup>2</sup>

***Characterization of Oxygenated Intermediates in ToMOH T201X (X=S, C, G, V) by Optical Spectroscopy.*** An optical band characteristic of the oxygenated intermediate in ToMOH T201 variants was monitored by using a HiTech DX2 stopped-flow spectrophotometer. The drive syringes and flow lines of this instrument were made anaerobic by passage of at least 10 mL of anaerobic solution of 4 mM sodium dithionite in 25 mM MOPS, pH 7 buffer. The excess dithionite was removed by flushing the syringes with anaerobic buffer. T201X ToMOH protein was reduced anaerobically by reacting the protein with excess sodium dithionite in the presence of an equimolar amount of methyl viologen for 30 min. The reduced protein was dialyzed against 1 L of 25 mM MOPS, pH 7.0 buffer for  $\sim 3$  hr, anaerobically. Following dialysis, the regulatory protein was added to the reduced hydroxylase. The solution was transferred to a tonometer and loaded into the anaerobic stopped flow instrument. This solution was mixed against an equal volume of  $\text{O}_2$ -saturated 25 mM MOPS, pH 7.0 buffer. The temperature was thermostatted using

a circulating water bath. Data were collected using either a PMT (photomultiplier tube) for halogen lamp illumination or a diode array detector for a xenon arc lamp. To vary the dioxygen concentration, nitrogen-saturated buffer was added to the dioxygen-saturated buffer to dilute the concentration of dioxygen. Buffers with varied pH values in the range of pH 6.5 - 8.0 were prepared with 25 mM MOPS buffer by adjusting the amount of NaOH/HCl solution. For KSIE measurements, deuterium oxide (99.9%) was purchased from Cambridge Isotope Laboratories or Icon Isotopes and used to prepare 25 mM MOPS buffer, pH 7.0. The pH value was adjusted by adding an appropriate amount of NaOD solution (Aldrich). Upon varying reaction conditions, including temperature and pH, no distinguishable differences in the optical feature of T201<sub>peroxo</sub> were observed. The time-dependent absorbance data were analyzed by the software packages Kinetic Studio (TgK Scientific) and Origin 6.1 (OriginLab Corporation). For the reaction of the T201C variant, the best fit was obtained with a three-exponential function, consisting of one formation and two consecutive decay processes corresponding to  $\text{ToMOH}_{\text{red}} \rightarrow \text{T201}_{\text{peroxo}} \rightarrow \text{T201}^*_{\text{peroxo}} \rightarrow \text{ToMOH}_{\text{ox}}$ , where T201\*<sub>peroxo</sub> and ToMOH<sub>ox</sub> are the sequential decay products of T201<sub>peroxo</sub> (eq 1). For simplicity, each component, ToMOH<sub>red</sub>, T201<sub>peroxo</sub>, T201\*<sub>peroxo</sub>, and ToMOH<sub>ox</sub>, and their

$$\text{Abs} = [\text{A}]_0 * (\epsilon_D + ((\epsilon_A - \epsilon_D) * \exp(-k_1 * x)) + ((\epsilon_B - \epsilon_D) * k_1 * 1 / (k_2 - k_1) * (\exp(-k_1 * x) - \exp(-k_2 * x))) + ((\epsilon_C - \epsilon_D) * k_1 * k_2 * 1 / (k_2 - k_1) * (1 / (k_3 - k_1) * (\exp(-k_1 * x) - \exp(-k_3 * x)) - 1 / (k_3 - k_2) * (\exp(-k_2 * x) - \exp(-k_3 * x)))))) \quad (1)$$

conversion rate constants are represented as A, B, C, and D, and as  $k_1$ ,  $k_2$ , and  $k_3$  respectively. The initial enzyme concentration was defined as  $[\text{A}]_0$ . For dioxygen activation with the T201G variant, a two-exponential function derived from  $\text{ToMOH}_{\text{red}} \rightarrow \text{T201}_{\text{peroxo}} \rightarrow \text{ToMOH}_{\text{ox}}$  gave the

best fit (eq 2). For simplicity,  $\text{ToMOH}_{\text{red}}$ ,  $\text{T201}_{\text{peroxo}}$ , and  $\text{ToMOH}_{\text{ox}}$  and rate constants for the conversion are abbreviated as A, B, and C and  $k_1$  and  $k_2$ , respectively.

$$\text{Abs} = \varepsilon_c * [A]_0 + (\varepsilon_A - \varepsilon_c) * [A]_0 * \exp(-k_1 * x) + (\varepsilon_B - \varepsilon_c) * [A]_0 * k_1 / (k_2 - k_1) * (\exp(-k_1 * x) - \exp(-k_2 * x)) \quad (2)$$

**Table S1.** X-ray data collection, phase determination, and refinement statistics of T201X variants (X= S, G, C, V).

|                                     | T201S                | T201G                | T201C                     | T201V                |
|-------------------------------------|----------------------|----------------------|---------------------------|----------------------|
| <b>Data Collection</b>              |                      |                      |                           |                      |
| Beamline                            | SSRL 11-1            | SSRL 11-1            | SSRL 12-2                 | SSRL 11-1            |
| Wavelength (Å)                      | 0.979                | 0.979                | 0.979                     | 0.979                |
| Space Group                         | P3 <sub>1</sub> 21   | P3 <sub>1</sub> 21   | P3 <sub>1</sub> 21        | P3 <sub>1</sub> 21   |
| Unit cell dimensions (Å)            | 182.8 x 182.8 x 68.9 | 183.0 x 183.0 x 68.7 | 183.249x 183.249 x 68.128 | 182.9 x 182.9 x 68.6 |
| Resolution range (Å)                | 50.0 - 2.90          | 50.0 - 2.10          | 50-2.4                    | 50.0 - 1.90          |
| Total Reflections                   | 223666               | 1151797              | 1539056                   | 1801358              |
| Unique Reflections                  | 29616                | 74572                | 48523                     | 98258                |
| Completeness (%) <sup>a</sup>       | 100 (99.9)           | 96.7 (92.9)          | 99.2 (96.8)               | 95.5 (84.6)          |
| I/s(I) <sup>a</sup>                 | 22.7 (7.7)           | 30.8 (3.8)           | 11.3 (4.2)                | 36.8 (2.9)           |
| R <sub>sym</sub> (%) <sup>a,b</sup> | 10.4 (31.2)          | 10.3 (56.0)          | 9.3 (48.3)                | 9.8 (66.0)           |
| <b>Refinement</b>                   |                      |                      |                           |                      |
| R <sub>cryst</sub> (%) <sup>c</sup> | 18.4                 | 22.3                 | 18.4                      | 20.6                 |
| R <sub>free</sub> (%) <sup>d</sup>  | 22.5                 | 23.5                 | 24.3                      | 21.8                 |
| Average B-value (Å <sup>2</sup> )   | 19.6                 | 35.6                 | 55.5                      | 33.9                 |
| r.m.s deviation bond length (Å)     | 0.008                | 0.007                | 0.031                     | 0.006                |
| r.m.s deviation bond angles (°)     | 1.54                 | 1.36                 | 2.39                      | 1.36                 |
| No. Protein Atoms                   | 7337                 | 7335                 | 7370                      | 7338                 |
| No. Non-Protein Atoms               | 159                  | 248                  | 164                       | 699                  |
| Fe Atoms                            | 2                    | 2                    | 2                         | 2                    |
| Water Molecules                     | 101                  | 196                  | 152                       | 597                  |
| PEG-400 Fragments                   | 2                    | 2                    | 1                         | 4                    |
| Glycerol Molecules                  | 3                    | 2                    | 0                         | 4                    |
| RMSD to Wild-Type ToMOH             | 0.170                | 0.136                | 0.178                     | 0.114                |
| PDB Code                            | 3N1Z                 | 3N1Y                 | 3N1X                      | 3N20                 |

<sup>a</sup>Values in parentheses are for the highest resolution shell. <sup>b</sup> $R_{\text{sym}} = \sum_i \sum_{hkl} |I_i(hkl) - \langle I(hkl) \rangle| / \sum_{hkl} \langle I(hkl) \rangle$ , where  $I_i(hkl)$  is the  $i$ th measured diffraction intensity and  $\langle I(hkl) \rangle$  is the mean intensity for the Miller index  $(hkl)$ . <sup>c</sup> $R_{\text{cryst}} = \sum_{hkl} |F_o(hkl) - |F_c(hkl)|| / \sum_{hkl} |F_o(hkl)|$ . <sup>d</sup> $R_{\text{free}} = R_{\text{cryst}}$  for a test set of reflections (5% in each case).

**Table S2.** Product distribution of ToMOH T201X variants in toluene and *o*-xylene oxidation (X= S, G, C, V).

| toluene oxidation           |              |              |              |              |              |
|-----------------------------|--------------|--------------|--------------|--------------|--------------|
|                             | Wild type    | T201S        | T201C        | T201G        | T201V        |
| <i>o</i> -cresol (%)        | 30 (2)       | 31 (1)       | 32 (1)       | 59 (1)       | 18 (1)       |
| <i>m</i> -cresol (%)        | 21 (1)       | 16 (0)       | 27 (1)       | 13 (1)       | 32 (1)       |
| <i>p</i> -cresol (%)        | 47 (1)       | 51 (1)       | 36 (1)       | 25 (1)       | 37 (1)       |
| benzyl alcohol (%)          | 2 (1)        | 2 (1)        | 4 (1)        | 3 (1)        | 12 (1)       |
| <i>o</i> -xylene oxidation  |              |              |              |              |              |
|                             | Wild type    | T201S        | T201C        | T201G        | T201V        |
| 2,3-dimethyl phenol (%)     | 19           | 36           | 32           | 64           | 15           |
| 3,4-dimethyl phenol (%)     | 81           | 64           | 68           | 36           | 85           |
| 2-methyl benzyl alcohol (%) | Not detected |

**Figure S1.** Active site coordination and geometry in (A) ToMOH T201G, (B) T201S, (C) T201V, (D) T201C, (E) wild type (PDB Code 2INC). Iron atoms are displayed as green spheres and solvent and oxygen ligands derived from PEG are shown as cyan spheres. Amino acid side chains are represented as sticks in grey (carbon), blue (nitrogen), and red (oxygen). Interatomic distances were represented in angstroms.

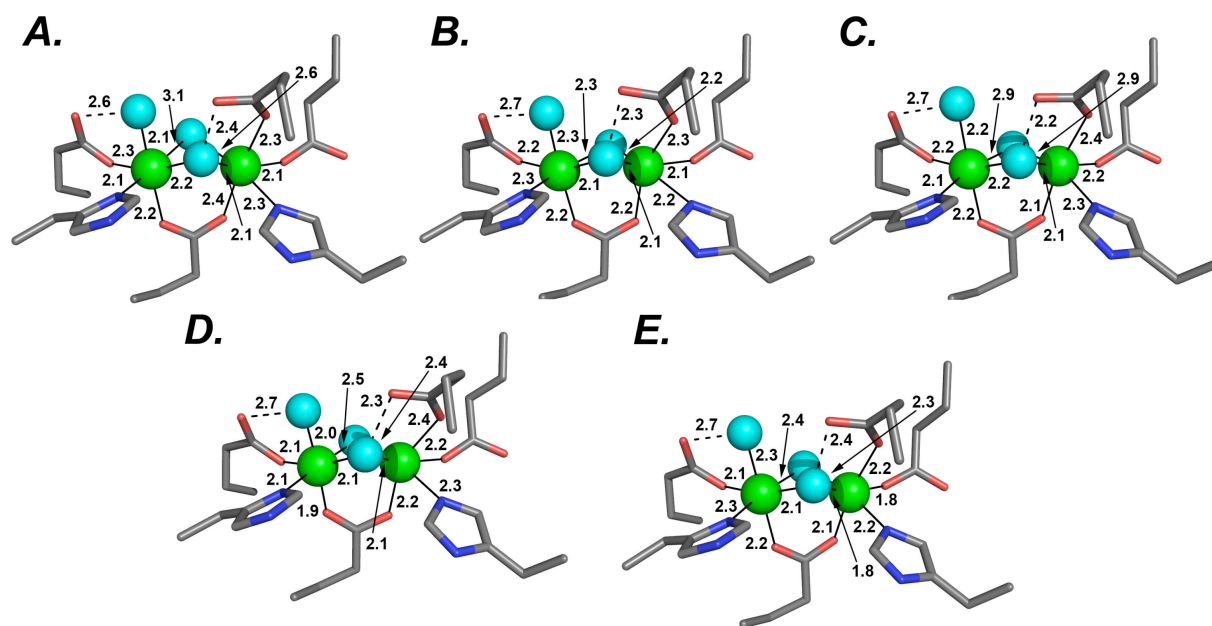



**Figure S2.** Michaelis-Menten kinetics of ToMOH wild-type and T201X variants for phenol oxidation.

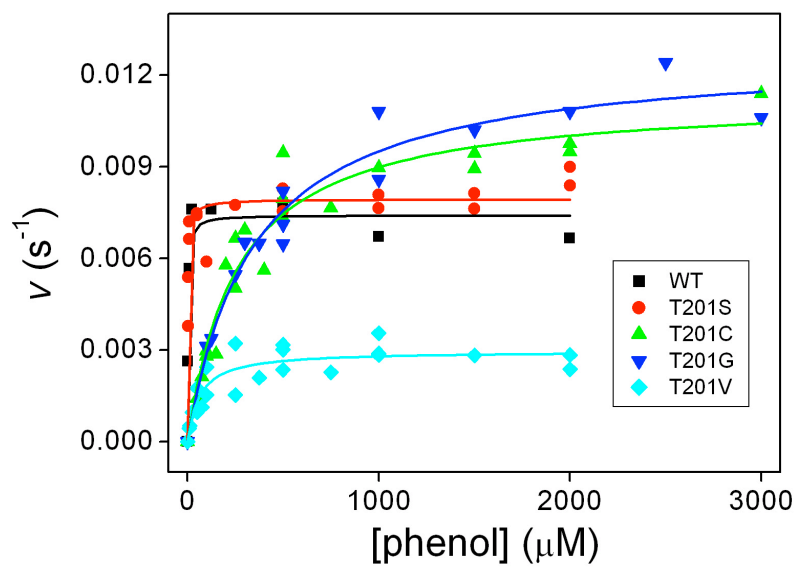

**Figure S3.** Change in absorption of UV-vis spectrum of the reaction of ToMOH<sub>red</sub>D T201X mixed with dioxygen-saturated buffer (X=C, G), [ToMOH T201X] = ~150  $\mu$ M, [ToMOD] = 450  $\mu$ M in 25 mM MOPS, pH 7.0 at  $4.0 \pm 0.1$  °C. (A) Formation of T201<sub>peroxo</sub> in ToMOH T201G at various reaction times. (B) Decay of T201<sub>peroxo</sub> in ToMOH T201G (C) Decay of T201<sub>peroxo</sub> in ToMOH T201C at various reaction times.

(A)

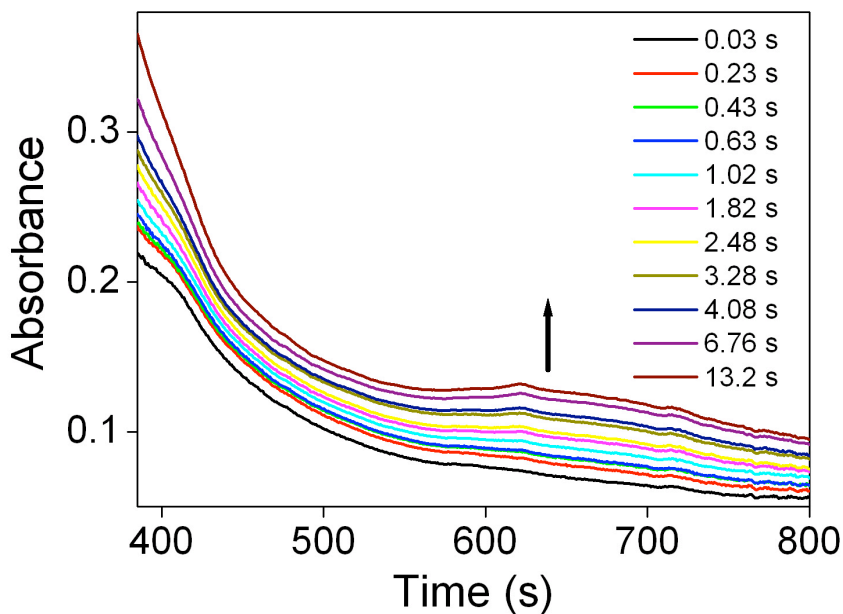

(B)

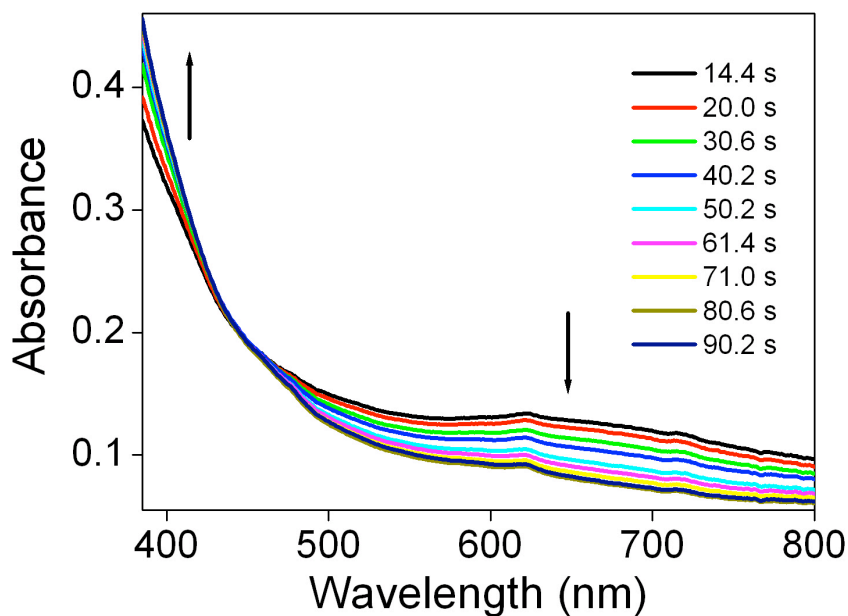

(C)

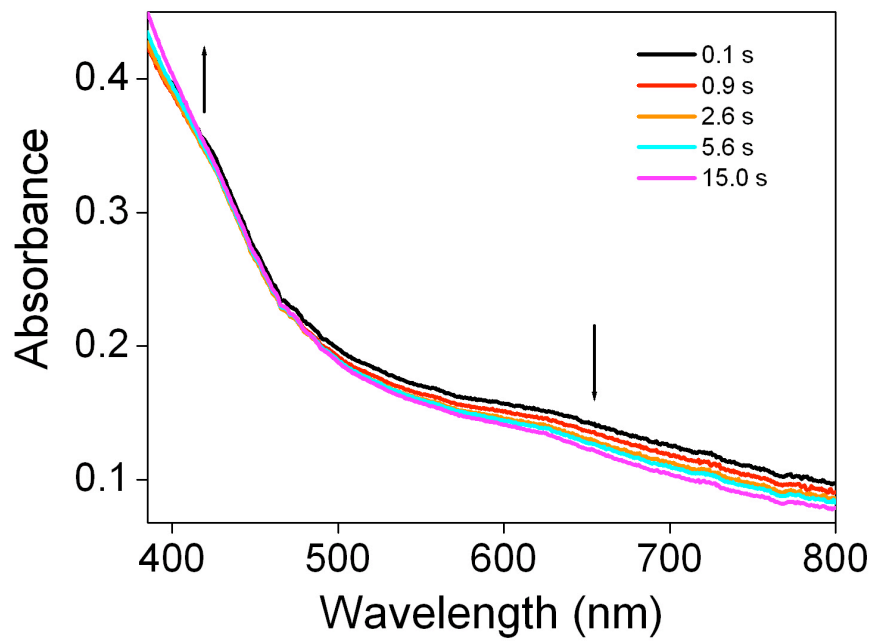

**Figure S4.** 4.2-K/53-mT Mössbauer spectra of oxygen activation in T201 variants of ToMOH. Left panel: (A) Spectrum of an anaerobic solution of T201S ToMOH<sub>red</sub>D ( $[^{57}\text{Fe}]/[\text{ToMOH}] = 3.5 \pm 0.1$ , 0.5 mM of ToMOH and 1.5 mM of ToMOD), which was allowed to react at 4 °C with an equal volume of an O<sub>2</sub>-saturated buffer solution for 45 ms using an Update Instruments rapid freeze-quench apparatus (vertical bars). The spectrum of an anaerobic control sample is overlaid as a solid line. (B) The experimental difference spectrum (vertical bars) fitted to four quadrupole doublets with the following parameters:  $\delta(1) = 0.65$  mm/s and  $\Delta E_Q(1) = 1.49$  mm/s (18 % of total intensity, blue line);  $\delta(2) = 0.53$  mm/s and  $\Delta E_Q(2) = 0.66$  mm/s (11 % of total intensity, red line);  $\delta(3) = 1.26$  mm/s and  $\Delta E_Q(3) = 3.46$  mm/s (-8 % of total intensity, orange line); and  $\delta(4) = 1.23$  mm/s and  $\Delta E_Q(4) = 2.40$  mm/s (-17 % of total intensity, green line). The total simulation is shown as a black line. The parameters of quadrupole doublets 1 and 2 are within the experimental uncertainty ( $\pm 0.03$  mm/s) identical to those published for T201<sub>peroxo</sub> and ToMOH<sub>peroxo</sub>.<sup>2</sup> The parameters of quadrupole doublets 3 and 4 are typical of high-spin Fe(II) and are assigned to the reactant complex.

Right panel: (A) Spectrum of an anaerobic solution of T201G ToMOH<sub>red</sub>D ( $[^{57}\text{Fe}]/[\text{ToMOH}] = 3.9 \pm 0.1$ , 0.6 mM of ToMOH and 1.8 mM ToMOD), which was mixed at 4 °C with an equal volume of an O<sub>2</sub>-saturated buffer solution for ca. 15 s before manual freezing of the sample (vertical bars). The spectrum of an anaerobic control sample is overlaid as a solid line and is scaled to account for 63% of the total intensity of the spectrum of the 15-s sample. (B) Removal of the features of the anaerobic complex results in the “reference spectrum” of the diiron(III/III) complexes in T201G ToMOH<sub>red</sub>D after a 15-s reaction time (vertical bars). Comparison of this spectrum to experimental reference spectra of T201<sub>peroxo</sub> (blue line) and ToMOH<sub>peroxo</sub> (red line), which were prepared by removal of the respective three other quadrupole doublets from the difference spectrum described in the left panel, reveals that ~10% of each species is present in the 15 s sample of the T201G ToMOH<sub>red</sub>D complex. In addition, there is additional broad absorption observed (purple bracket), which emanates from a quadrupole doublet with parameters [ $\delta \approx 0.5$  mm/s and  $\Delta E_Q \approx 1.1$  mm/s] typical of high-spin Fe(III) and is assigned to one or more additional diiron(III/III) complexes.

T201S-ToMOH

T201G-ToMOH

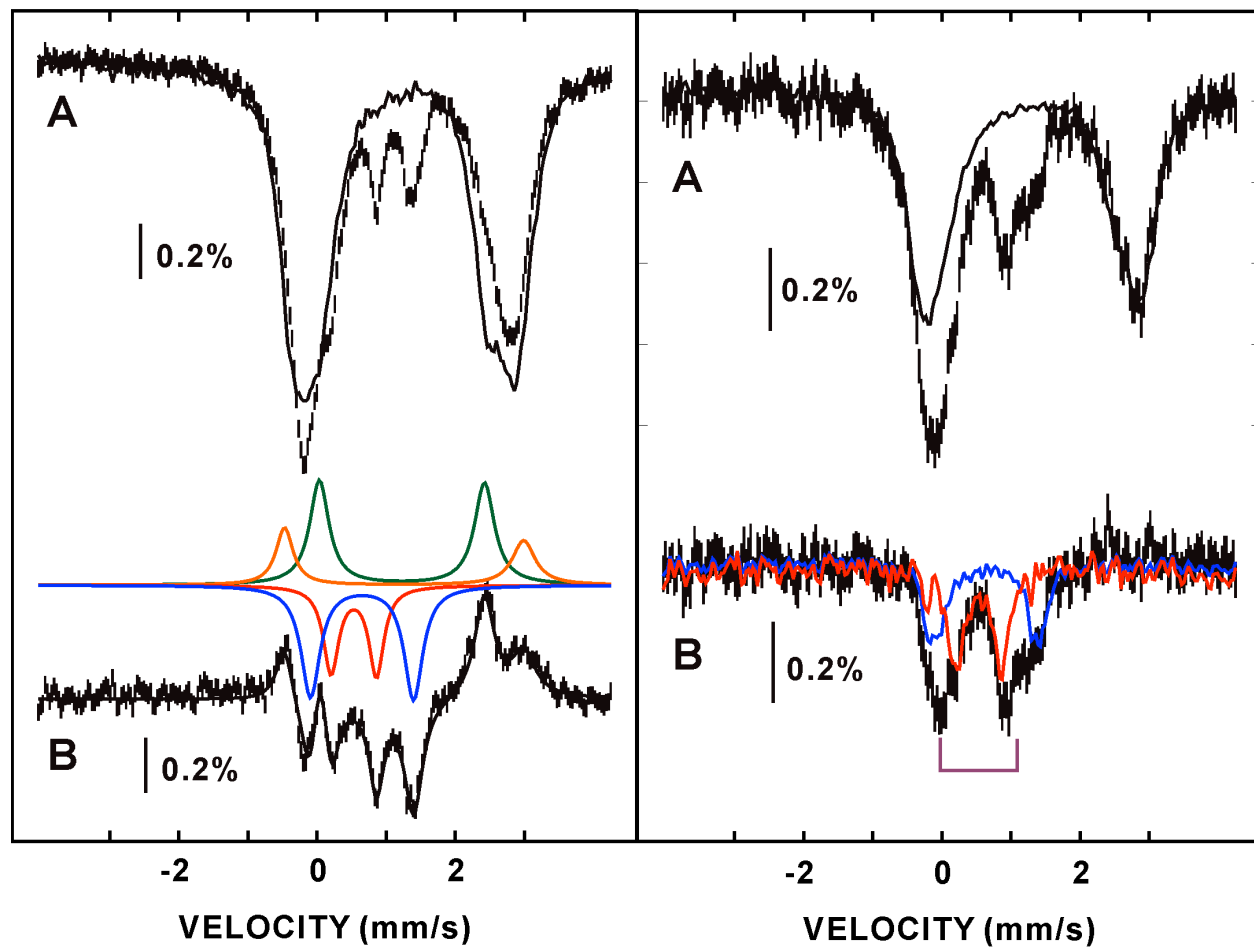

**Figure S5.** Time-resolved stopped-flow absorption spectra at 675 nm in the reaction of T201X ToMOH<sub>red</sub>:D (~150 μM) at 4 °C with O<sub>2</sub> saturated buffer. (A) T201C (B) T201G variants. The formation and decay trace of T201<sub>peroxo</sub> (black dots) was fitted as described in the experimental section (red solid line). The best fit in T201C enzyme gave the following parameters as  $\epsilon_{\text{ToMOH}_{\text{red}}} = 527 \pm 4 \text{ cm}^{-1}\text{M}^{-1}$ ,  $\epsilon_{\text{T201peroxo}} = 663.1 \pm 0.3 \text{ cm}^{-1}\text{M}^{-1}$ ,  $\epsilon_{\text{T201peroxo}^*} = 609 \pm 3 \text{ cm}^{-1}\text{M}^{-1}$ ,  $\epsilon_{\text{ToMOH}_{\text{Hox}}} = 486.3 \pm 0.5 \text{ cm}^{-1}\text{M}^{-1}$ ,  $k_1 = 82 \pm 2 \text{ s}^{-1}$ ,  $k_2 = 1.2 \pm 0.1 \text{ s}^{-1}$ ,  $k_3 = 0.204 \pm 0.004 \text{ s}^{-1}$  when the initial concentration of the enzyme,  $[\text{ToMOH}_{\text{red}}]_0$ , set to 0.00015 M ( $R^2 = 0.998$ ), was assumed to be equal to the concentration of T201<sub>peroxo</sub> generated in the reaction. The best fit in T201G variant gave the following parameters as  $\epsilon_{\text{ToMOH}_{\text{red}}} = 593.0 \pm 0.4 \text{ cm}^{-1}\text{M}^{-1}$ ,  $\epsilon_{\text{T201peroxo}} = 826 \pm 2 \text{ cm}^{-1}\text{M}^{-1}$ ,  $\epsilon_{\text{ToMOH}_{\text{Hox}}} = 558 \pm 3 \text{ cm}^{-1}\text{M}^{-1}$ ,  $k_1 = 0.128 \pm 0.002 \text{ s}^{-1}$ ,  $k_2 = 0.0209 \pm 0.0007 \text{ s}^{-1}$  when  $[\text{ToMOH}_{\text{red}}]_0$ , was set to 0.00014 M ( $R^2 = 0.996$ ). The lower value of  $\epsilon_{\text{T201peroxo}}$  than we have determined from the UV-vis and Mössbauer spectra (~1500  $\text{cm}^{-1}\text{M}^{-1}$ ) was resulted from the partitioning of ToMOH<sub>red</sub> in that not all of ToMOH<sub>red</sub> was converted to T201<sub>peroxo</sub> species.

(A)

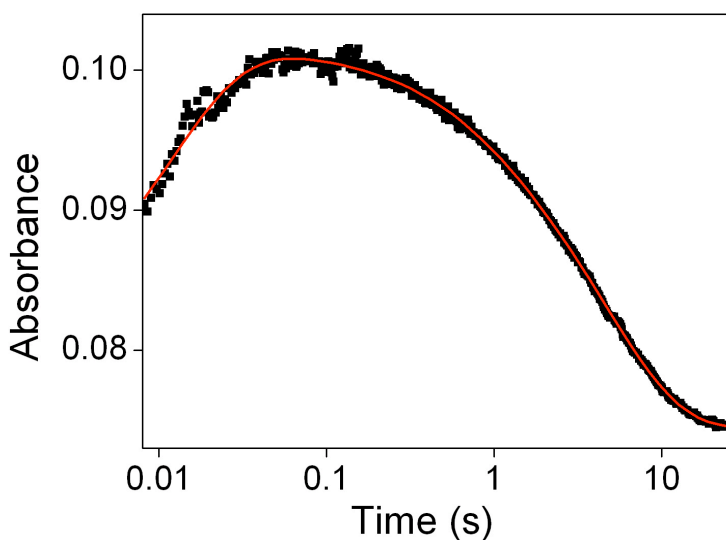

(B)

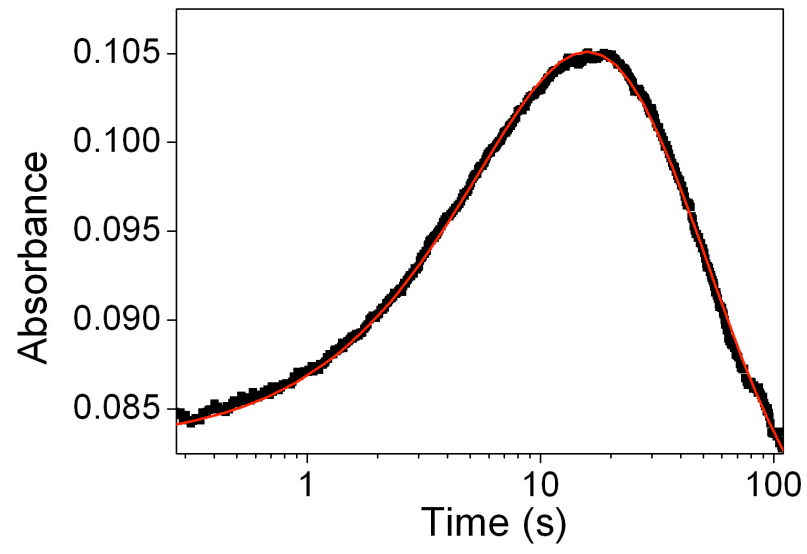

**Figure S6.** Eyring plot for the formation rates of T201<sub>peroxo</sub> species in T201 variants. (A) T201S, (B) T201C, and (C) T201G. Time-resolved stopped-flow absorption spectra at 675 nm in the reaction of T201X ToMOH<sub>red</sub>:3D (~150  $\mu$ M) with O<sub>2</sub> saturated buffer were monitored at 4-20 °C. Data in T201S and T201G variants were linearly fit to measure the activation parameters.

(A)

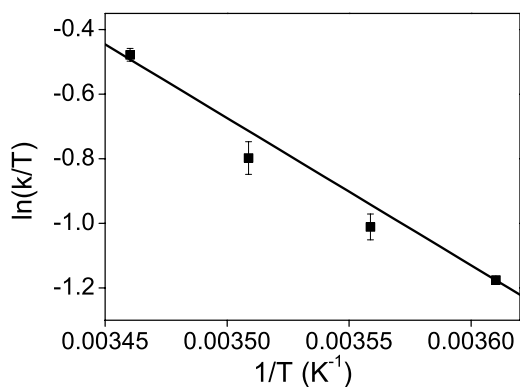

(B)

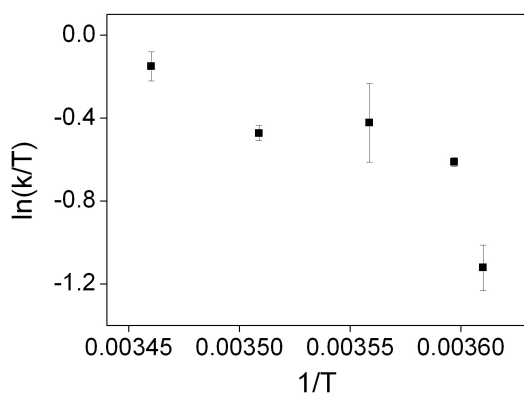

(C)

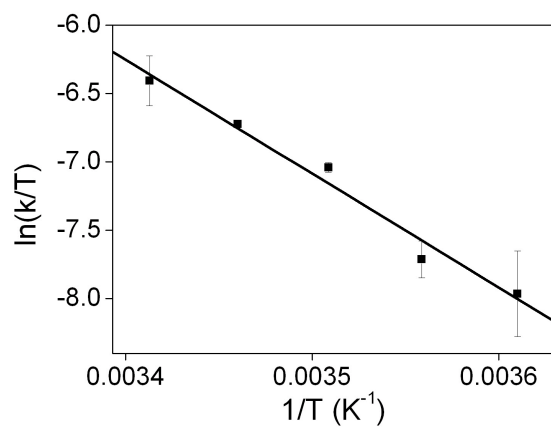



## Reference

- (1) Cafaro, V.; Scognamiglio, R.; Viggiani, A.; Izzo, V.; Passaro, I.; Notomista, E.; Dal Piaz, F.; Amoresano, A.; Casbarra, A.; Pucci, P.; Di Donato, A. *Eur. J. Biochem.* **2002**, *269*, 5689-5699.
- (2) Song, W. J.; Behan, K. R.; Naik, S.; Huynh, B. H.; Lippard, S. J. *J. Am. Chem. Soc.* **2009**, *131*, 6074-6075.
- (3) Murray, L. J.; Naik, S. G.; Ortillo, D. O.; García-Serres, R.; Lee, J. K.; Huynh, B. H.; Lippard, S. J. *J. Am. Chem. Soc.* **2007**, *129*, 14500-14510.
- (4) Tinberg, C. E.; Song, W. J.; Izzo, V.; Lippard, S. J., Unpublished work.
- (5) Sazinsky, M. H.; Bard, J.; Di Donato, A.; Lippard, S. J. *J. Biol. Chem.* **2004**, *279*, 30600-30610.
- (6) McCormick, M. S.; Sazinsky, M. H.; Condon, K. L.; Lippard, S. J. *J. Am. Chem. Soc.* **2006**, *128*, 15108-15110.
